# Supplementary material for: Relationship of plasma biomarkers to digital cognitive tests in alzheimer’s disease
Source: bioRxiv or medRxiv preprint supplement (doi:10.1101/2023.08.21.23293786), 2024-01-23
Supplement: Supplementary file [file media-1.pdf]

# Supplementary Materials

|                                                                                                                                                                                                                |          |
|----------------------------------------------------------------------------------------------------------------------------------------------------------------------------------------------------------------|----------|
| <b>Supplementary Materials</b> .....                                                                                                                                                                           | <b>1</b> |
| Supplementary Table 1. Digital cognitive metrics. The raw measures are followed by normalised measures.....                                                                                                    | 2        |
| Supplementary Figure 1. Preprocessing pipeline for plasma biomarkers .....                                                                                                                                     | 6        |
| Supplementary Figure 2. Group comparison for all digital cognitive metrics in Oxford Memory Task (OMT) and Object-in-Scene Task (OIS). All metrics were normalised based on age-matched normative data, .....  | 7        |
| Supplementary Figure 3. Group comparison for all digital cognitive metrics in ROCF, DSST and TMT. ROCF = Rey–Osterrieth Complex Figure, DSST = Digit Symbol Substitution Task, TMT = Trail Making Test . ..... | 8        |
| Supplementary Figure 4. Apathy and depression are not strongly correlated with plasma biomarkers or performance at digital cognitive tests .....                                                               | 9        |
| Supplementary Figure 5. Which cognitive metric or plasma biomarker best predicts pTau181 or A $\beta$ 42/40 levels ? .....                                                                                     | 10       |

**Supplementary Table 1. Digital cognitive metrics.**

The raw measures are followed by normalised measures.

| Digital Cognitive Tasks | Metrics                     | AD (n=46)    | EHC 1 (n=53) | EHC 2 (n=256) | AD vs EHC 1 |                           | AD vs EHC 2 |                           | EHC 1 vs EHC 2 |                           |
|-------------------------|-----------------------------|--------------|--------------|---------------|-------------|---------------------------|-------------|---------------------------|----------------|---------------------------|
|                         |                             |              |              |               | p value     | Rank-Biserial Correlation | p value     | Rank-Biserial Correlation | p value        | Rank-Biserial Correlation |
| OMT                     | Identification Accuracy (%) | 81.9 (10.1)  | 93.1 (4.7)   | 90.4 (6.1)    | * < 0.001   | 0.66                      | * < 0.001   | 0.48                      | 0.001          | -0.3                      |
|                         | Identification Accuracy (z) | -1.9 (2.0)   | 0.3 (0.9)    | -0.3 (1.2)    | * < 0.001   | 0.66                      | * < 0.001   | 0.49                      | * < 0.001      | -0.35                     |
|                         | Location Error (pixels)     | 241.9 (83.9) | 122.9 (43.9) | 142.2 (69.5)  | * < 0.001   | -0.76                     | * < 0.001   | -0.66                     | n.s.           | 0.18                      |
|                         | Location Error (z)          | 3.1 (2.6)    | -0.1 (1.0)   | 0.4 (1.5)     | * < 0.001   | -0.77                     | * < 0.001   | -0.66                     | 0.014          | 0.23                      |
|                         | Identification Time (s)     | 4.2 (2.0)    | 2.6 (1.3)    | 2.2 (0.7)     | * < 0.001   | -0.57                     | * < 0.001   | -0.69                     | 0.006          | -0.26                     |
|                         | Identification Time (z)     | 3.6 (3.9)    | 0.6 (2.5)    | 0.1 (1.5)     | * < 0.001   | -0.52                     | * < 0.001   | -0.59                     | n.s.           | -0.14                     |
|                         | Localisation Time (s)       | 8.6 (3.3)    | 5.9 (1.8)    | 2.7 (1.2)     | * < 0.001   | -0.54                     | * < 0.001   | -0.97                     | * < 0.001      | -0.92                     |
|                         | Localisation Time (z)       | 3.0 (2.6)    | 1.2 (1.0)    | -0.4 (1.0)    | * < 0.001   | -0.51                     | * < 0.001   | -0.91                     | * < 0.001      | -0.83                     |
|                         | Target Detection Rate (%)   | 52.6 (16.9)  | 75.8 (7.9)   | 69.7 (14.0)   | * < 0.001   | 0.75                      | * < 0.001   | 0.59                      | 0.002          | -0.28                     |
|                         | Target Detection Rate (z)   | -2.0 (1.5)   | 0.3 (0.7)    | -0.4 (1.3)    | * < 0.001   | 0.83                      | * < 0.001   | 0.62                      | * < 0.001      | -0.35                     |
|                         | Misbinding Error Rate (%)   | 36.1 (11.6)  | 22.2 (7.1)   | 28.9 (9.6)    | * < 0.001   | -0.7                      | * < 0.001   | -0.42                     | * < 0.001      | 0.46                      |

|            |                                                         |              |             |             |           |       |           |       |           |       |
|------------|---------------------------------------------------------|--------------|-------------|-------------|-----------|-------|-----------|-------|-----------|-------|
|            | Misbinding Error Rate(z)                                | 1.0 (1.2)    | -0.5 (0.7)  | 0.2 (1.0)   | * < 0.001 | -0.72 | * < 0.001 | -0.43 | * < 0.001 | 0.47  |
|            | Guessing Error Rate (%)                                 | 29.4 (12.4)  | 13.1 (5.1)  | 15.9 (10.4) | * < 0.001 | -0.75 | * < 0.001 | -0.63 | n.s.      | 0.13  |
|            | Guessing Error Rate (z)                                 | 2.5 (1.8)    | -0.2 (0.8)  | 0.4 (1.5)   | * < 0.001 | -0.83 | * < 0.001 | -0.67 | 0.017     | 0.22  |
|            | Imprecision (pixels)                                    | 138.9 (65.3) | 71.2 (25.3) | 91.9 (55.1) | * < 0.001 | -0.65 | * < 0.001 | -0.48 | * < 0.001 | 0.37  |
|            | Imprecision (z)                                         | 2.6 (2.7)    | -0.3 (1.2)  | 0.5 (2.0)   | * < 0.001 | -0.66 | * < 0.001 | -0.5  | * < 0.001 | 0.38  |
|            |                                                         |              |             |             |           |       |           |       |           |       |
| <b>OIS</b> | Object Identification Accuracy - Immediate Recall (%)   | 73.1 (16.8)  | 96.0 (4.1)  | 94.7 (7.9)  | * < 0.001 | 0.89  | * < 0.001 | 0.84  | n.s.      | 0.03  |
|            | Object Identification Accuracy - Immediate Recall (z)   | -4.2 (3.6)   | 0.0 (0.9)   | -0.3 (1.4)  | * < 0.001 | 0.89  | * < 0.001 | 0.81  | n.s.      | -0.07 |
|            | Object Identification Accuracy - Delayed Recall (%)     | 27.3 (19.9)  | 70.6 (17.1) | 68.4 (17.8) | * < 0.001 | 0.86  | * < 0.001 | 0.86  | n.s.      | -0.09 |
|            | Object Identification Accuracy - Delayed Recall (z)     | -2.4 (1.3)   | 0.0 (1.0)   | -0.2 (1.0)  | * < 0.001 | 0.86  | * < 0.001 | 0.8   | n.s.      | -0.15 |
|            | Semantic Identification Accuracy - Immediate Recall (%) | 90.0 (12.0)  | 99.7 (0.9)  | 99.4 (3.8)  | * < 0.001 | 0.63  | * < 0.001 | 0.63  | n.s.      | 0.05  |
|            | Semantic Identification Accuracy - Immediate Recall (z) | -4.4 (5.1)   | 0.1 (0.7)   | -0.5 (3.8)  | 0.003     | 0.72  | * < 0.001 | 0.67  | n.s.      | -0.07 |
|            | Semantic Identification Accuracy - Delayed Recall (%)   | 38.0 (25.8)  | 81.3 (13.6) | 79.3 (15.1) | * < 0.001 | 0.81  | * < 0.001 | 0.8   | n.s.      | -0.07 |

|              |                                                       |             |             |             |           |       |           |       |       |       |
|--------------|-------------------------------------------------------|-------------|-------------|-------------|-----------|-------|-----------|-------|-------|-------|
|              | Semantic Identification Accuracy - Delayed Recall (z) | -3.3 (2.2)  | -0.0 (1.0)  | -0.3 (1.1)  | * < 0.001 | 0.82  | * < 0.001 | 0.78  | n.s.  | -0.13 |
|              | Location Error - Immediate Recall (cm)                | 3.6 (2.4)   | 1.0 (0.3)   | 1.0 (0.9)   | * < 0.001 | -0.83 | * < 0.001 | -0.84 | n.s.  | -0.11 |
|              | Location Error - Immediate Recall (z)                 | 8.0 (7.0)   | 0.2 (1.0)   | 0.2 (2.5)   | * < 0.001 | -0.8  | * < 0.001 | -0.81 | n.s.  | -0.07 |
|              | Location Error - Delayed Recall (cm)                  | 6.1 (3.8)   | 1.9 (0.9)   | 2.1 (1.4)   | * < 0.001 | -0.76 | * < 0.001 | -0.72 | n.s.  | 0.02  |
|              | Location Error - Delayed Recall (z)                   | 4.4 (3.5)   | 0.2 (1.0)   | 0.3 (1.4)   | * < 0.001 | -0.76 | * < 0.001 | -0.73 | n.s.  | -0.01 |
|              |                                                       |             |             |             |           |       |           |       |       |       |
| <b>ROCF</b>  | Copy Raw Score (%)                                    | 73.6 (24.0) | 90.6 (2.9)  | 89.6 (5.3)  | * < 0.001 | 0.7   | * < 0.001 | 0.63  | n.s.  | -0.09 |
|              | Copy Score (z)                                        | -6.0 (7.9)  | 0.1 (0.9)   | -0.4 (1.9)  | * < 0.001 | 0.69  | * < 0.001 | 0.6   | n.s.  | -0.11 |
|              | Immediate Recall Raw Score (%)                        | 49.5 (20.2) | 85.1 (7.8)  | 82.1 (9.5)  | * < 0.001 | 0.92  | * < 0.001 | 0.88  | 0.024 | -0.2  |
|              | Immediate Recall Score (z)                            | -5.2 (3.1)  | 0.1 (1.0)   | -0.4 (1.3)  | * < 0.001 | 0.92  | * < 0.001 | 0.86  | 0.006 | -0.25 |
|              |                                                       |             |             |             |           |       |           |       |       |       |
| <b>CORSI</b> | Mean Location Error                                   | 21.4 (8.1)  | 10.6 (3.5)  | 11.2 (5.3)  | * < 0.001 | -0.84 | * < 0.001 | -0.77 | n.s.  | 0.03  |
|              | Mean Location Error (z)                               | 2.8 (2.3)   | -0.0 (0.9)  | 0.4 (1.5)   | * < 0.001 | -0.8  | * < 0.001 | -0.68 | n.s.  | 0.13  |
|              |                                                       |             |             |             |           |       |           |       |       |       |
| <b>DSST</b>  | Number of Correct Responses                           | 14.2 (7.1)  | 35.2 (9.0)  | 38.1 (10.7) | * < 0.001 | 0.91  | * < 0.001 | 0.93  | n.s.  | 0.15  |
|              | Number of Correct Responses (z)                       | -2.5 (1.6)  | -0.2 (0.9)  | -0.1 (1.2)  | * < 0.001 | 0.82  | * < 0.001 | 0.78  | n.s.  | 0.04  |
|              |                                                       |             |             |             |           |       |           |       |       |       |
| <b>TMT</b>   | TMT A Completion Time (s)                             | 51.7 (27.2) | 28.7 (10.7) | 25.7 (7.2)  | * < 0.001 | -0.81 | * < 0.001 | -0.89 | 0.032 | -0.19 |

|                                 |                  |             |             |           |       |           |       |       |       |
|---------------------------------|------------------|-------------|-------------|-----------|-------|-----------|-------|-------|-------|
| TMT A Completion Time (z)       | 5.2 (6.5)        | 0.5 (2.1)   | 0.2 (1.4)   | * < 0.001 | -0.83 | * < 0.001 | -0.85 | n.s.  | -0.08 |
| TMT B Completion Time (s)       | 162.8<br>(162.7) | 39.4 (11.0) | 37.2 (13.1) | * < 0.001 | -0.9  | * < 0.001 | -0.92 | n.s.  | -0.18 |
| TMT B Completion Time (z)       | 12.9 (19.5)      | 0.2 (1.2)   | 0.3 (1.5)   | * < 0.001 | -0.89 | * < 0.001 | -0.86 | n.s.  | -0.02 |
| Average TMT Completion Time (s) | 107.3<br>(94.2)  | 34.1 (9.7)  | 31.5 (9.2)  | * < 0.001 | -0.91 | * < 0.001 | -0.93 | 0.031 | -0.2  |
| Average TMT Completion Time (z) | 10.8 (15.5)      | 0.3 (1.4)   | 0.2 (1.3)   | * < 0.001 | -0.89 | * < 0.001 | -0.88 | n.s.  | -0.06 |

**Supplementary Figure 1. Preprocessing pipeline for plasma biomarkers.**

- 6 x 10 ml blood in EDTA bottles was collected
- Within 30 minutes, blood was centrifuged at 1800 g for 10 minutes, at room temperature
- Plasma was then transferred into a 50 ml propylene tube and mixed
- It was then aliquoted into Fluid X cryovials (0.5 ml), scanned and logged
- Cryovials were kept in a fridge (4 C) for up to 8 hours
- They were then transferred into a -80 C freezer for long-term storage

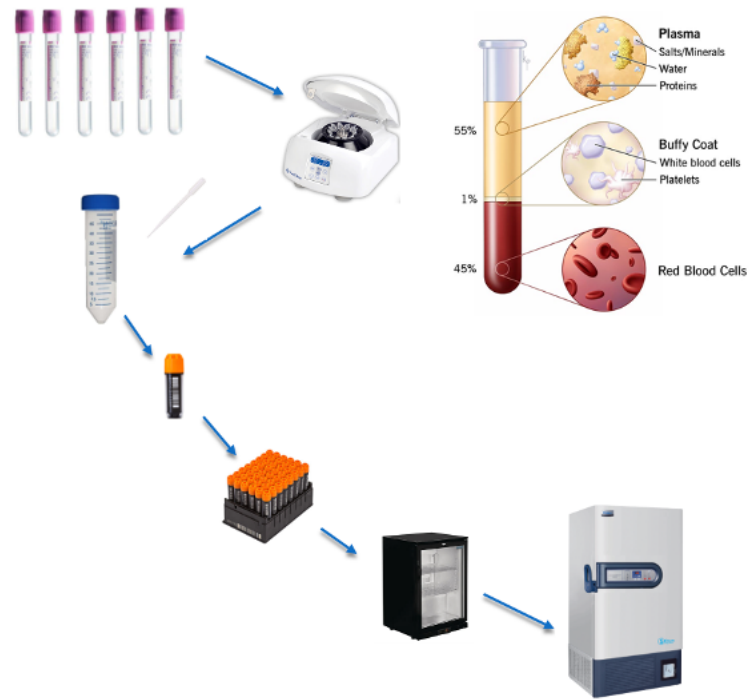

**Supplementary Figure 2. Group comparison for all digital cognitive metrics in Oxford Memory Task (OMT) and Object-in-Scene Task (OIS). All metrics were normalised based on age-matched normative data .**

AD EHC

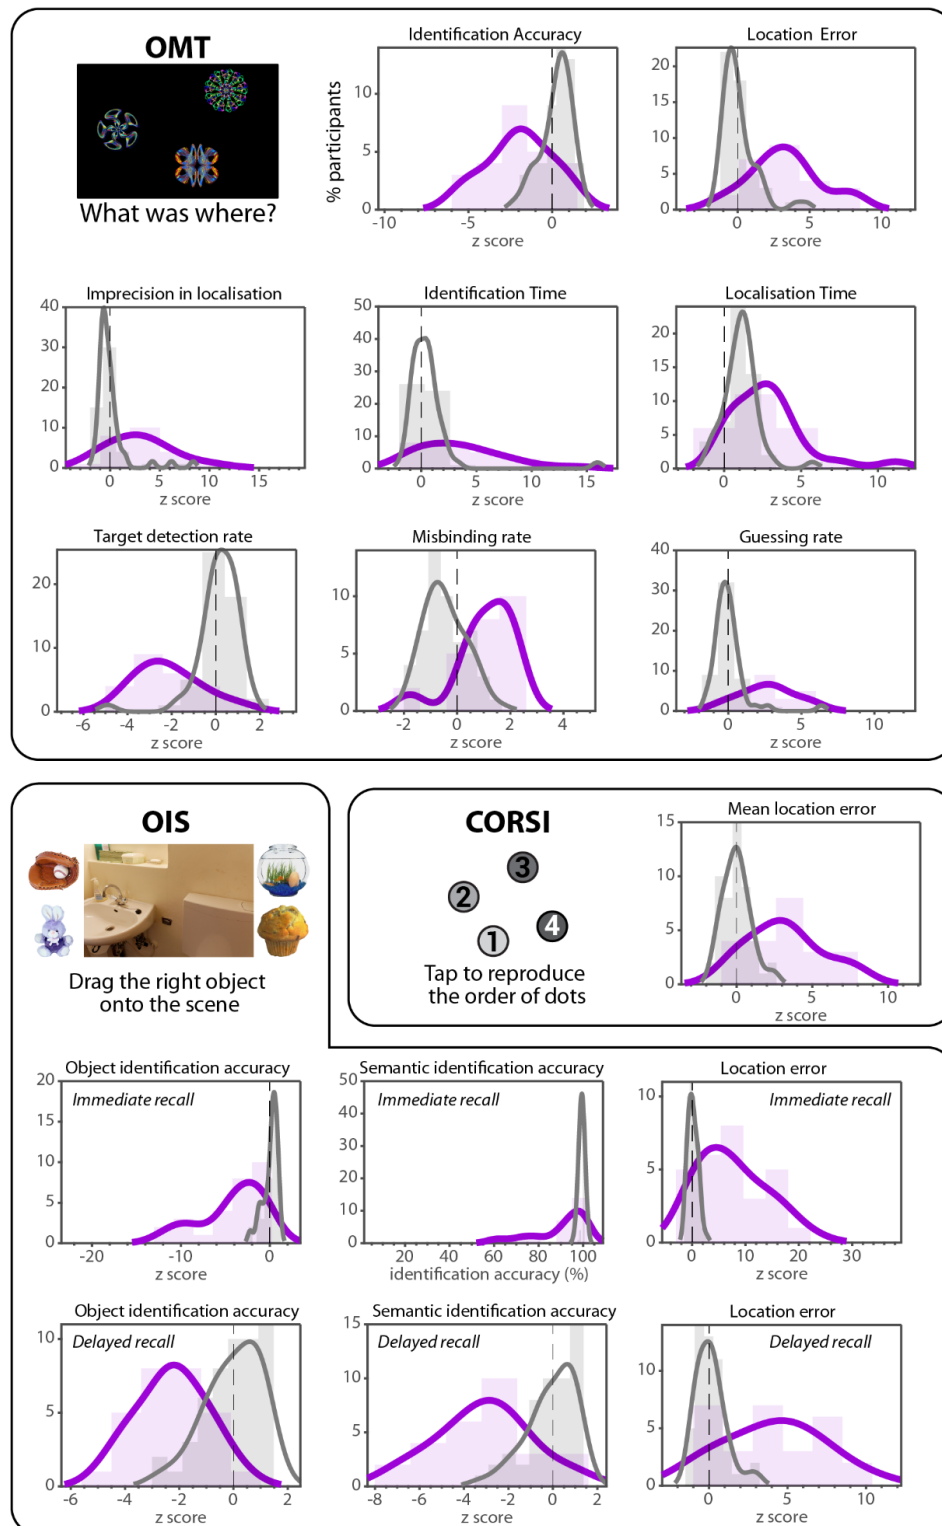

**Supplementary Figure 3. Group comparison for all digital cognitive metrics in ROCF, DSST and TMT.** ROCF = Rey–Osterrieth Complex Figure, DSST = Digit Symbol Substitution Task, TMT = Trail Making Test,

AD EHC

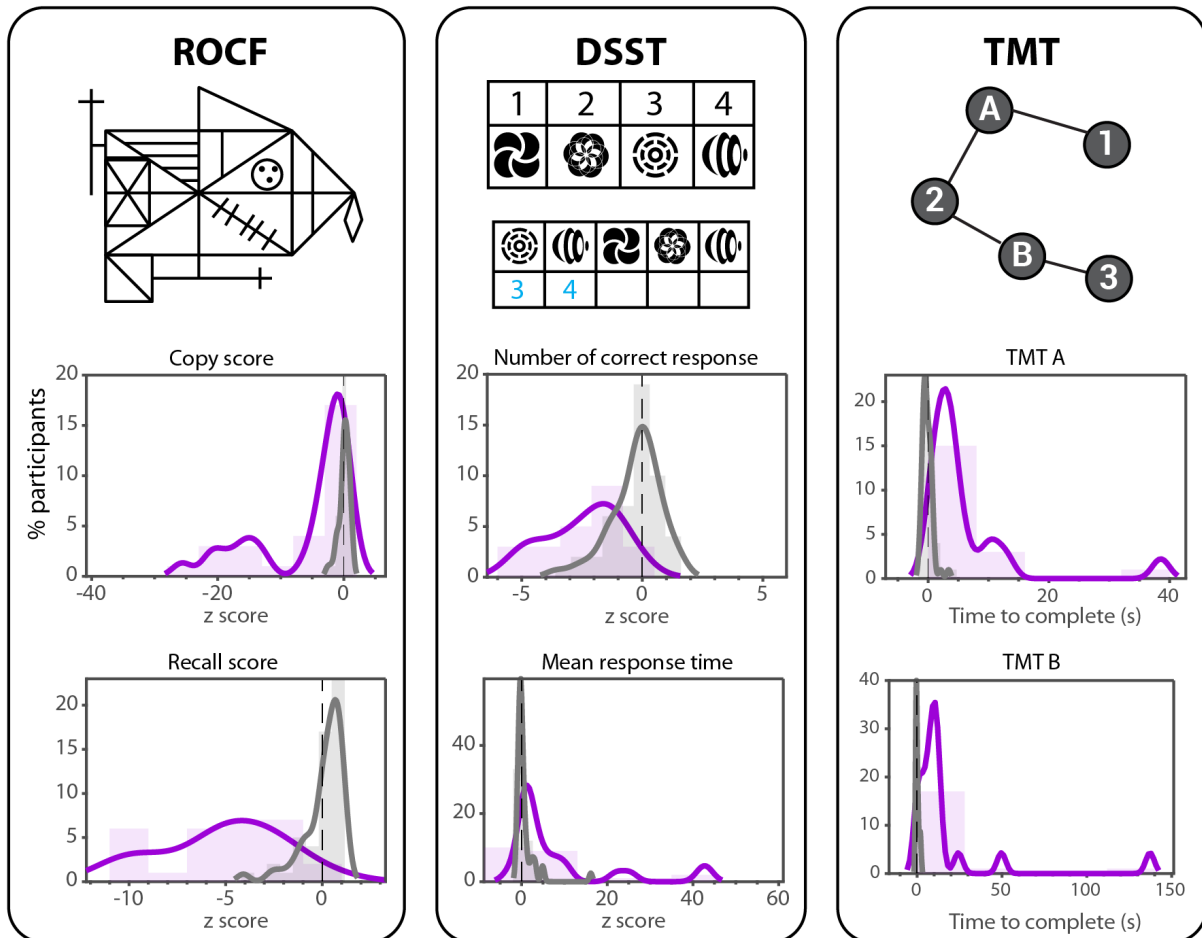



**Supplementary Figure 4. Apathy and depression are not strongly correlated with plasma biomarkers or performance at digital cognitive tests.**

Network plot of relationships between questionnaire-derived apathy (AMI, Apathy Motivation Index), depression (GDS, Geriatric Depression Scale), all plasma biomarkers and online digital cognitive tasks (clustered on the bottom right). Associations are presented in graded colours, where red is associated with a negative correlation and light blue with a positive correlation. The shorter distance between two metrics indicates a stronger relationship (larger correlation coefficient). For online tasks, only one metric was selected per task, according to the highest effect size in discriminating between groups.

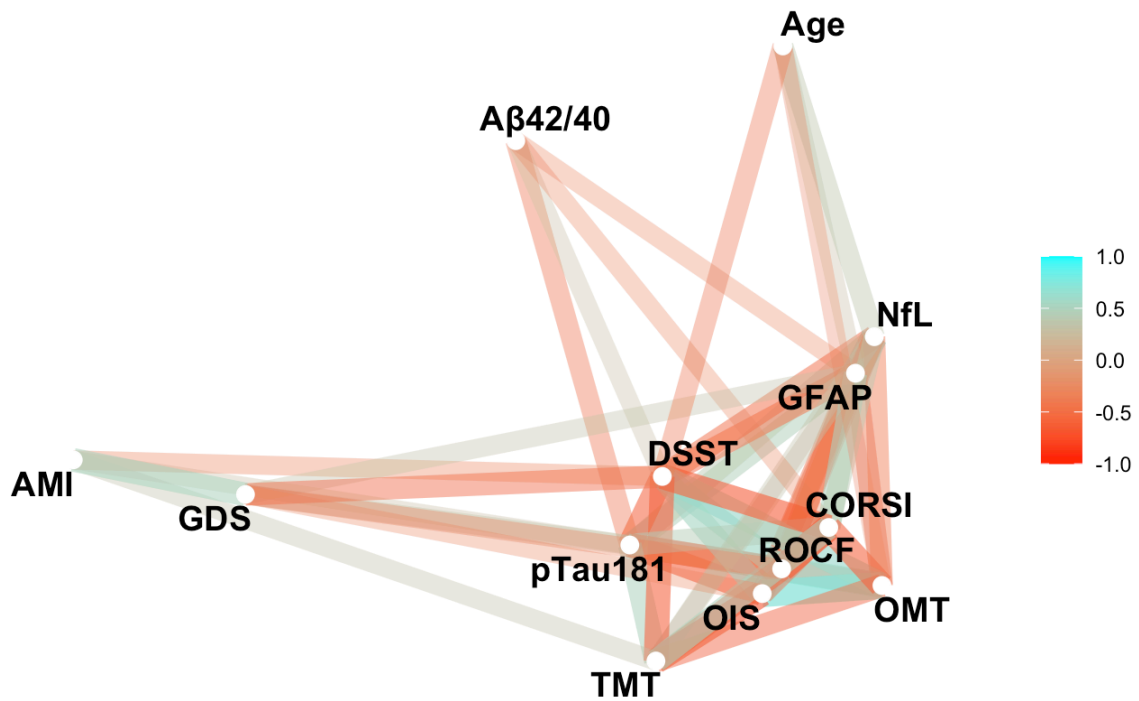

**Supplementary Figure 5. Which cognitive metric or plasma biomarker best predicts pTau181 or Aβ42/40 levels?**

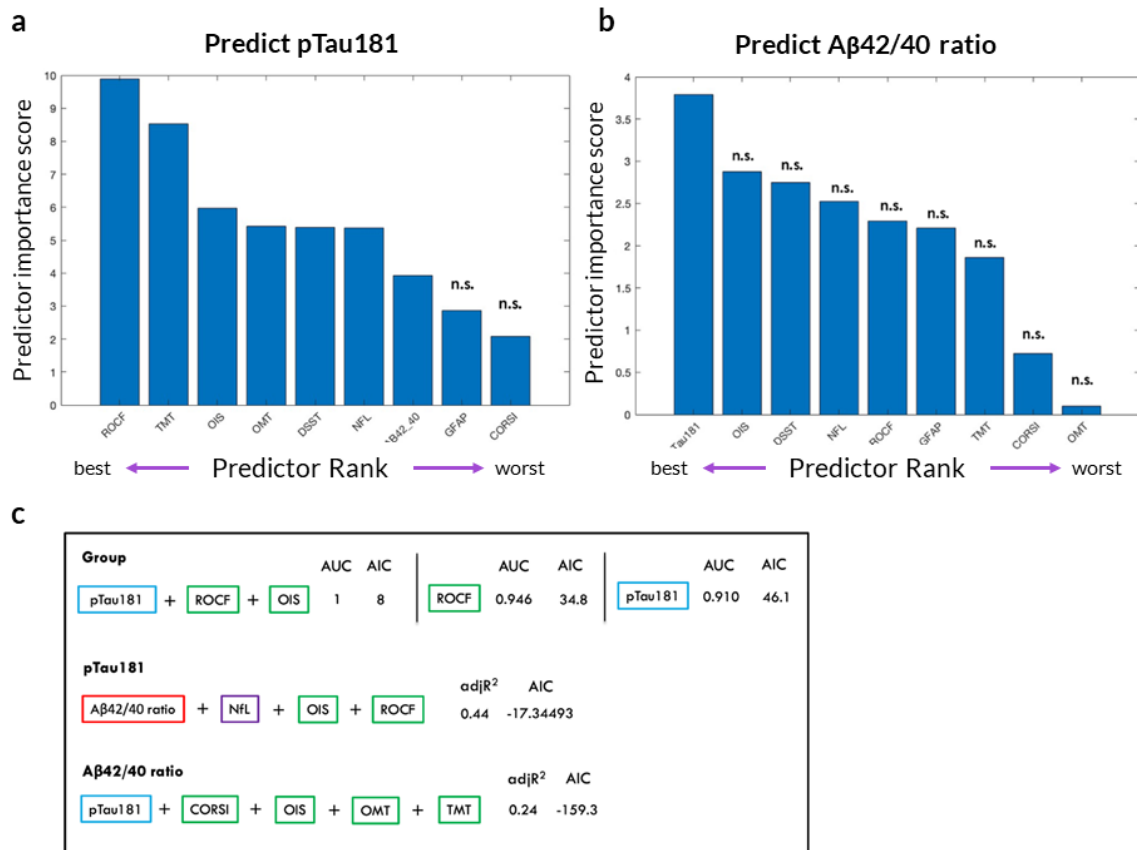

**(a) Which cognitive metric or plasma biomarker best predicts pTau181? ROCF was the winner.** NFL and Aβ42/40 ratio significantly predict the level of pTau181, but ranked behind ROCF, TMT, OIS, OMT and DSST in these five online cognitive tasks. The biomarker GFAP and the memory task CORSI could not significantly predict pTau181 level. n.s. = not significant. **(b) Ranked biomarkers and digital cognitive metrics in predicting Aβ42/40 ratio.** pTau181 was the only metric which significantly predicted Aβ42/40 ratio. OMT = Identification accuracy of the Oxford Memory Task, OIS = Object Identification Accuracy in Immediate Recall of the Object-in-Scene Memory Task, ROCF = recall of the Rey–Osterrieth Complex Figure, DSST = number of correct responses of the Digit Symbol Substitution Task, TMT = average reaction time of the Trail Making Test, CORSI = average location error of the Freestyle Corsi Block Task. **(c) Best combinations of biomarkers and digital cognitive metrics in predicting group (top), pTau181 (middle) and Aβ42/40 ratio (bottom).** AUC = area under the curve. AIC = Akaike information criterion.
